# Supplementary material
Source: PubMed Central journal article supplement (PMC5520067)
Supplement: ejhg201755x4.pdf [file ejhg201755x4.pdf]

| <b>Supplemental Table 1: Expert curated functional gene-sets</b> |                |
|------------------------------------------------------------------|----------------|
| <b>GENE_SET</b>                                                  | <b>N genes</b> |
| Synaptic: Cell adhesion and trans-synaptic signaling             | 81             |
| Synaptic: Cell metabolism                                        | 57             |
| Synaptic: Endocytosis                                            | 26             |
| Synaptic: Excitability                                           | 59             |
| Synaptic: Exocytosis                                             | 87             |
| Synaptic: GPCR signaling                                         | 41             |
| Synaptic: G-protein relay                                        | 27             |
| Synaptic: intracellular signal transduction                      | 150            |
| Synaptic: Intracellular trafficking                              | 80             |
| Synaptic: Ion balance/transport                                  | 43             |
| Synaptic: Ligand-gated ion channel signaling                     | 36             |
| Synaptic: Neurotransmitter metabolism                            | 29             |
| Synaptic: Peptide/neurotrophin signals                           | 28             |
| Synaptic: Protein cluster                                        | 47             |
| Synaptic: RPSFB                                                  | 71             |
| Synaptic: Structural plasticity                                  | 98             |
| Synaptic: Tyrosine kinase signaling                              | 7              |
| Synaptic: Unknown                                                | 61             |
| Synaptic: Sanders FDR 0.01 large synaptic                        | 19             |
| FMRP targets (Ascano)                                            | 936            |
| FMRP targets (Ascano Autism overlap)                             | 93             |
| FMRP targets (Darnell)                                           | 780            |
| Glia astrocytes Duncan                                           | 42             |
| Glia oligodendrocytes Duncan                                     | 52             |
| Glia Duncan                                                      | 146            |
| Glutamate Duncan                                                 | 156            |
| Mitochondria: Duncan                                             | 74             |
| Mitochondria: Crista Duncan                                      | 6              |
| Mitochondria: Distribution Duncan                                | 7              |
| Mitochondria: Fission Duncan                                     | 12             |
| Mitochondria: Fission_plus Duncan                                | 24             |
| Mitochondria: Fusion Duncan                                      | 9              |
