# Supplementary material
Source: PubMed Central journal article supplement (PMC5520067)
Supplement: ejhg201755x5.pdf [file ejhg201755x5.pdf]

| <b>Supplemental table 5: results of the INRICH analyses of all gene-sets</b> |                       |          |                                |
|------------------------------------------------------------------------------|-----------------------|----------|--------------------------------|
| <b>GENE-SET</b>                                                              | <b>P1 in Clumping</b> | <b>P</b> | <b>P<sub>CORR</sub> (P*19)</b> |
| Synaptic: Cell adhesion and trans-synaptic signaling                         | 0.0001                | 0,6963   | 1                              |
| Synaptic: Ion balance/transport                                              | 0.0001                | 0,0576   | 1                              |
| Synaptic: Ligand-gated ion channel signaling                                 | 0.0001                | 1        | 1                              |
| Synaptic: Neurotransmitter metabolism                                        | 0.0001                | 1        | 1                              |
| Synaptic: Peptide/neurotrophin signals                                       | 0.0001                | 1        | 1                              |
| Synaptic: Protein cluster                                                    | 0.0001                | 0,0512   | 0,9726062                      |
| Synaptic: RPSFB                                                              | 0.0001                | 1        | 1                              |
| Synaptic: Structural plasticity                                              | 0.0001                | 1        | 1                              |
| Synaptic: Tyrosine kinase signaling                                          | 0.0001                | 1        | 1                              |
| Synaptic: Unknown                                                            | 0.0001                | 1        | 1                              |
| Synaptic: Cell metabolism                                                    | 0.0001                | 0,0704   | 1                              |
| Synaptic: Endocytosis                                                        | 0.0001                | 1        | 1                              |
| Synaptic: Excitability                                                       | 0.0001                | 1        | 1                              |
| Synaptic: Exocytosis                                                         | 0.0001                | 1        | 1                              |
| Synaptic: GPCR signaling                                                     | 0.0001                | 1        | 1                              |
| Synaptic: G protein relay                                                    | 0.0001                | 1        | 1                              |
| Synaptic: Intracellular signal transduction                                  | 0.0001                | 0,2921   | 1                              |
| Synaptic: Intracellular trafficking                                          | 0.0001                | 1        | 1                              |
| Synaptic: Sanders FDR 0.01 large synaptic                                    | 0.0001                | 1        | 1                              |
| <b>GENE-SET</b>                                                              | <b>P1 IN CLUMPING</b> | <b>P</b> | <b>P<sub>CORR</sub> (P*3)</b>  |
| FMRP targets (Ascano)                                                        | 0.0001                | 0,530    | 1                              |
| FMRP targets (Ascano Autism overlap)                                         | 0.0001                | 1        | 1                              |
| FMRP targets (Darnell)                                                       | 0.0001                | 0,010    | 0,031                          |
| <b>GENE_SET</b>                                                              | <b>P1 IN CLUMPING</b> | <b>P</b> | <b>P<sub>CORR</sub> (P*3)</b>  |
| Glia astrocytes Duncan                                                       | 0.0001                | 1        | 1                              |
| Glia oligodendrocytes Duncan                                                 | 0.0001                | 1        | 1                              |
| Glia Duncan                                                                  | 0.0001                | 1        | 1                              |
| <b>GENE_SET</b>                                                              | <b>P1 IN CLUMPING</b> | <b>P</b> | <b>P<sub>CORR</sub> (P*1)</b>  |
| Glutamate Duncan                                                             | 0.0001                | 0,694    | 0,694                          |
| <b>GENE_SET</b>                                                              | <b>P1 IN CLUMPING</b> | <b>P</b> | <b>P<sub>CORR</sub> (P*6)</b>  |
| Mitochondria: Crista Duncan                                                  | 0.0001                | 1        | 1                              |
| Mitochondria: Distribution Duncan                                            | 0.0001                | 1        | 1                              |
| Mitochondria: Duncan                                                         | 0.0001                | 1        | 1                              |
| Mitochondria: Fission Duncan                                                 | 0.0001                | 1        | 1                              |
| Mitochondria: Fission_plus Duncan                                            | 0.0001                | 1        | 1                              |
| Mitochondria: Fusion Duncan                                                  | 0.0001                | 1        | 1                              |
| <b>GENE-SET</b>                                                              | <b>P1 in Clumping</b> | <b>P</b> | <b>P<sub>CORR</sub> (P*19)</b> |
| Synaptic: Cell adhesion and trans-synaptic signaling                         | 0.01                  | 1,00000  | 1                              |
| Synaptic: Ion balance/transport                                              | 0.01                  | 0,77705  | 1                              |
| Synaptic: Ligand-gated ion channel signaling                                 | 0.01                  | 0,97421  | 1                              |
| Synaptic: Neurotransmitter metabolism                                        | 0.01                  | 0,23035  | 1                              |
| Synaptic: Peptide/neurotrophin signals                                       | 0.01                  | 0,99820  | 1                              |
| Synaptic: Protein cluster                                                    | 0.01                  | 0,99940  | 1                              |
| Synaptic: RPSFB                                                              | 0.01                  | 0,67527  | 1                              |
| Synaptic: Structural plasticity                                              | 0.01                  | 0,63047  | 1                              |
| Synaptic: Tyrosine kinase signaling                                          | 0.01                  | 0,99960  | 1                              |
| Synaptic: Unknown                                                            | 0.01                  | 0,77485  | 1                              |

| Synaptic: Cell metabolism                            | 0.01           | 0,35493  | 1                        |
|------------------------------------------------------|----------------|----------|--------------------------|
| Synaptic: Endocytosis                                | 0.01           | 0,99700  | 1                        |
| Synaptic: Excitability                               | 0.01           | 0,99200  | 1                        |
| Synaptic: Exocytosis                                 | 0.01           | 0,99840  | 1                        |
| Synaptic: GPCR signaling                             | 0.01           | 1,00000  | 1                        |
| Synaptic: G protein relay                            | 0.01           | 0,77425  | 1                        |
| Synaptic: Intracellular signal transduction          | 0.01           | 0,99720  | 1                        |
| Synaptic: Intracellular trafficking                  | 0.01           | 0,92821  | 1                        |
| Synaptic: Sanders FDR 0.01 large synaptic            | 0.01           | 0,99940  | 1                        |
| GENE-SET                                             | P1 IN CLUMPING | P        | P <sub>CORR</sub> (P*3)  |
| FMRP targets (Ascano)                                | 0.01           | 1        | 1                        |
| FMRP targets (Ascano Autism overlap)                 | 0.01           | 0,9996   | 1                        |
| FMRP targets (Darnell)                               | 0.01           | 1        | 1                        |
| GENE_SET                                             | P1 IN CLUMPING | P        | P <sub>CORR</sub> (P*3)  |
| Glia astrocytes Duncan                               | 0.01           | 0,355    | 1                        |
| Glia oligodendrocytes Duncan                         | 0.01           | 0,603    | 1                        |
| Glia Duncan                                          | 0.01           | 0,983    | 1                        |
| GENE_SET                                             | P1 IN CLUMPING | P        | P <sub>CORR</sub> (P*1)  |
| Glutamate Duncan                                     | 0.01           | 1        | 1                        |
| GENE_SET                                             | P1 IN CLUMPING | P        | P <sub>CORR</sub> (P*6)  |
| Mitochondria: Crista Duncan                          | 0.01           | 0,723    | 1                        |
| Mitochondria: Distribution Duncan                    | 0.01           | 0,857    | 1                        |
| Mitochondria: Duncan                                 | 0.01           | 0,930    | 1                        |
| Mitochondria: Fission Duncan                         | 0.01           | 0,195    | 1                        |
| Mitochondria: Fission_plus Duncan                    | 0.01           | 0,612    | 1                        |
| Mitochondria: Fusion Duncan                          | 0.01           | 0,106    | 0,635                    |
| GENE-SET                                             | P1 in Clumping | P        | P <sub>CORR</sub> (P*19) |
| Synaptic: Cell adhesion and trans-synaptic signaling | 0.00896288     | 1        | 1                        |
| Synaptic: Ion balance/transport                      | 0.00896288     | 0,826635 | 1                        |
| Synaptic: Ligand-gated ion channel signaling         | 0.00896288     | 0,933213 | 1                        |
| Synaptic: Neurotransmitter metabolism                | 0.00896288     | 0,152370 | 1                        |
| Synaptic: Peptide/neurotrophin signals               | 0.00896288     | 0,997401 | 1                        |
| Synaptic: Protein cluster                            | 0.00896288     | 0,997001 | 1                        |
| Synaptic: RPSFB                                      | 0.00896288     | 0,638672 | 1                        |
| Synaptic: Structural plasticity                      | 0.00896288     | 0,753449 | 1                        |
| Synaptic: Tyrosine kinase signaling                  | 0.00896288     | 0,997201 | 1                        |
| Synaptic: Unknown                                    | 0.00896288     | 0,598080 | 1                        |
| Synaptic: Cell metabolism                            | 0.00896288     | 0,341532 | 1                        |
| Synaptic: Endocytosis                                | 0.00896288     | 0,991002 | 1                        |
| Synaptic: Excitability                               | 0.00896288     | 0,984803 | 1                        |
| Synaptic: Exocytosis                                 | 0.00896288     | 0,991202 | 1                        |
| Synaptic: GPCR signaling                             | 0.00896288     | 1,000000 | 1                        |
| Synaptic: G protein relay                            | 0.00896288     | 0,946011 | 1                        |
| Synaptic: Intracellular signal transduction          | 0.00896288     | 0,996001 | 1                        |
| Synaptic: Intracellular trafficking                  | 0.00896288     | 0,929414 | 1                        |
| Synaptic: Sanders FDR 0.01 large synaptic            | 0.00896288     | 0,996401 | 1                        |
| GENE-SET                                             | P1 IN CLUMPING | P        | P <sub>CORR</sub> (P*3)  |
| FMRP targets (Ascano)                                | 0.00896288     | 1        | 1                        |
| FMRP targets (Ascano Autism overlap)                 | 0.00896288     | 0,998    | 1                        |

|                                                      |                       |          |                                |
|------------------------------------------------------|-----------------------|----------|--------------------------------|
| FMRP targets (Darnell)                               | 0.00896288            | 1        | 1                              |
| <b>GENE_SET</b>                                      | <b>P1 IN CLUMPING</b> | <b>P</b> | <b>P<sub>CORR</sub> (P*3)</b>  |
| Glia astrocytes Duncan                               | 0.00896288            | 0,339    | 1                              |
| Glia oligodendrocytes Duncan                         | 0.00896288            | 0,585    | 1                              |
| Glia Duncan                                          | 0.00896288            | 0,984    | 1                              |
| <b>GENE_SET</b>                                      | <b>P1 IN CLUMPING</b> | <b>P</b> | <b>P<sub>CORR</sub> (P*1)</b>  |
| Glutamate Duncan                                     | 0.00896288            | 1        | 1                              |
| <b>GENE_SET</b>                                      | <b>P1 IN CLUMPING</b> | <b>P</b> | <b>P<sub>CORR</sub> (P*6)</b>  |
| Mitochondria: Crista Duncan                          | 0.00896288            | 0,688    | 1                              |
| Mitochondria: Distribution Duncan                    | 0.00896288            | 0,814    | 1                              |
| Mitochondria: Duncan                                 | 0.00896288            | 0,962    | 1                              |
| Mitochondria: Fission Duncan                         | 0.00896288            | 0,338    | 1                              |
| Mitochondria: Fission_plus Duncan                    | 0.00896288            | 0,720    | 1                              |
| Mitochondria: Fusion Duncan                          | 0.00896288            | 0,211    | 1                              |
| <b>GENE-SET</b>                                      | <b>P1 in Clumping</b> | <b>P</b> | <b>P<sub>CORR</sub> (P*19)</b> |
| Synaptic: Cell adhesion and trans-synaptic signaling | 0.0008106764          | 0,902    | 1                              |
| Synaptic: Ion balance/transport                      | 0.0008106764          | 0,345    | 1                              |
| Synaptic: Ligand-gated ion channel signaling         | 0.0008106764          | 0,388    | 1                              |
| Synaptic: Neurotransmitter metabolism                | 0.0008106764          | 0,520    | 1                              |
| Synaptic: Peptide/neurotrophin signals               | 0.0008106764          | 0,744    | 1                              |
| Synaptic: Protein cluster                            | 0.0008106764          | 0,750    | 1                              |
| Synaptic: RPSFB                                      | 0.0008106764          | 0,299    | 1                              |
| Synaptic: Structural plasticity                      | 0.0008106764          | 0,797    | 1                              |
| Synaptic: Tyrosine kinase signaling                  | 0.0008106764          | 1        | 1                              |
| Synaptic: Unknown                                    | 0.0008106764          | 0,126    | 1                              |
| Synaptic: Cell metabolism                            | 0.0008106764          | 0,224    | 1                              |
| Synaptic: Endocytosis                                | 0.0008106764          | 1        | 1                              |
| Synaptic: Excitability                               | 0.0008106764          | 0,748    | 1                              |
| Synaptic: Exocytosis                                 | 0.0008106764          | 0,590    | 1                              |
| Synaptic: GPCR signaling                             | 0.0008106764          | 0,724    | 1                              |
| Synaptic: G protein relay                            | 0.0008106764          | 0,741    | 1                              |
| Synaptic: Intracellular signal transduction          | 0.0008106764          | 0,773    | 1                              |
| Synaptic: Intracellular trafficking                  | 0.0008106764          | 0,688    | 1                              |
| Synaptic: Sanders FDR 0.01 large synaptic            | 0.0008106764          | 0,611    |                                |
| <b>GENE-SET</b>                                      | <b>P1 IN CLUMPING</b> | <b>P</b> | <b>P<sub>CORR</sub> (P*3)</b>  |
| FMRP targets (Ascano)                                | 0.0008106764          | 0,141    | 0,424                          |
| FMRP targets (Ascano Autism overlap)                 | 0.0008106764          | 0,376    | 1                              |
| FMRP targets (Darnell)                               | 0.0008106764          | 0,143    | 0,428                          |
| <b>GENE_SET</b>                                      | <b>P1 IN CLUMPING</b> | <b>P</b> | <b>P<sub>CORR</sub> (P*3)</b>  |
| Glia astrocytes Duncan                               | 0.0008106764          | 0,198    | 0,594                          |
| Glia oligodendrocytes Duncan                         | 0.0008106764          | 0,359    | 1                              |
| Glia Duncan                                          | 0.0008106764          | 0,396    | 1                              |
| <b>GENE_SET</b>                                      | <b>P1 IN CLUMPING</b> | <b>P</b> | <b>P<sub>CORR</sub> (P*1)</b>  |
| Glutamate Duncan                                     | 0.0008106764          | 0,824    | 0,824                          |
| <b>GENE_SET</b>                                      | <b>P1 IN CLUMPING</b> | <b>P</b> | <b>P<sub>CORR</sub> (P*6)</b>  |
| Mitochondria: Crista Duncan                          | 0.0008106764          | 1        | 1                              |
| Mitochondria: Distribution Duncan                    | 0.0008106764          | 1        | 1                              |
| Mitochondria: Duncan                                 | 0.0008106764          | 0,774    | 1                              |
| Mitochondria: Fission Duncan                         | 0.0008106764          | 0,120    | 0,721                          |

|                                   |              |       |       |
|-----------------------------------|--------------|-------|-------|
| Mitochondria: Fission_plus Duncan | 0.0008106764 | 0,491 | 1     |
| Mitochondria: Fusion Duncan       | 0.0008106764 | 0,072 | 0,434 |

---

**$P_{CORR}$  = P value corrected for multiple testing =  $P*N$  gene-sets per hypothesis**

**$P1$  in clumping procedure based on:**

0.01 = strict SNP P-value cut off

0.001 = strict SNP P-value cut off

0.00896288 = cut off SNP P-value of top 1%

0.0008106764 = cut off SNP P-value of top 0.1%
